# Supplementary material
Source: publisher figshare collection journal article supplement (https://frontiersin.figshare.com/ndownloader/files/21490413)
Supplement: Supplementary file 1 [file 21490413]

## *Supplementary Material*

# **Tailoring the electrochemical behaviors of bismuth ferrite using Ca ion doping**

**Chao-Jie Ma,<sup>1,2,3</sup> Na Li,<sup>1,2,3,\*</sup> Wei-Li Song<sup>1,2</sup>**

<sup>1</sup> Institute of Advanced Structure Technology, Beijing Institute of Technology, Beijing 100081, China.

<sup>2</sup> Beijing Key Laboratory of Lightweight Multi-functional Composite Materials and Structures, Beijing Institute of Technology, Beijing 100081, China.

<sup>3</sup> School of Materials Science and Engineering, Beijing Institute of Technology, Beijing 100081, China

**\* Correspondence:**

Na Li

3120185550@bit.edu.cn (N. Li)

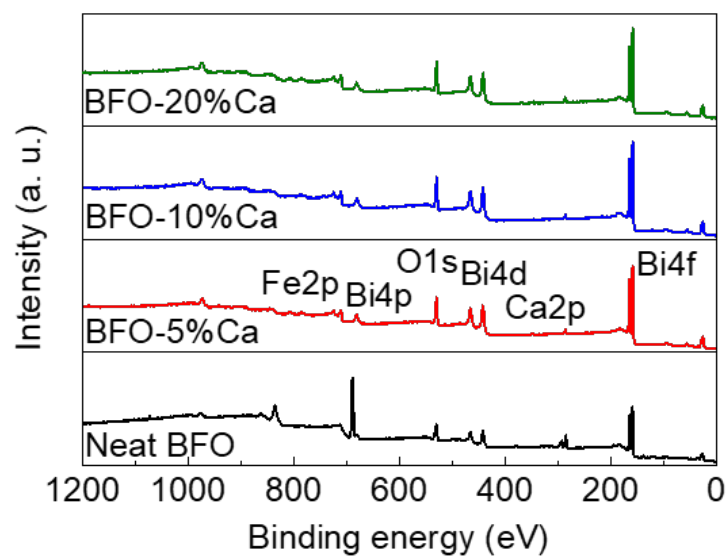

Figure S1 The wide XPS survey spectrum of BFO samples with different calcium ions doping amount

The full XPS survey spectrum of the BFO samples with different calcium ions doping amount is shown in Figure S1, in which prominent peaks are Bi 4f, Bi 4d, Bi 4p, Fe 2p and O 1s peaks, and the less

intense ones are identified as Ca2p peaks, indicating the existence of Bi, Ca, Fe and O elements in the BFO samples with different calcium ions doping amount.

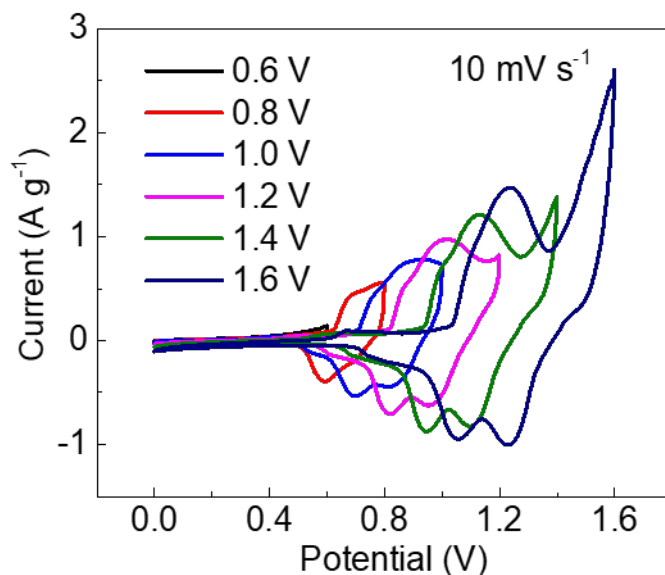

Figure S2 CV plots of hybrid electrochemical energy storage device at various potential windows in 6mol L<sup>-1</sup> KOH aqueous solution at 10 mV s<sup>-1</sup> scan rate.

The potential windows of hybrid electrochemical energy storage devices was determined by CV at different potential windows at 10 mV s<sup>-1</sup> scan rate (Figure S2). The final voltage range of 0-1.4V was selected in accordance with the absence of polarization in the 6 mol L<sup>-1</sup> KOH aqueous solution.
